# Supplementary material
Source: PubMed Central journal article supplement (PMC6330084)
Supplement: NIHMS80112-supplement-Supplementary_figure_2.pdf [file NIHMS80112-supplement-Supplementary_figure_2.pdf]

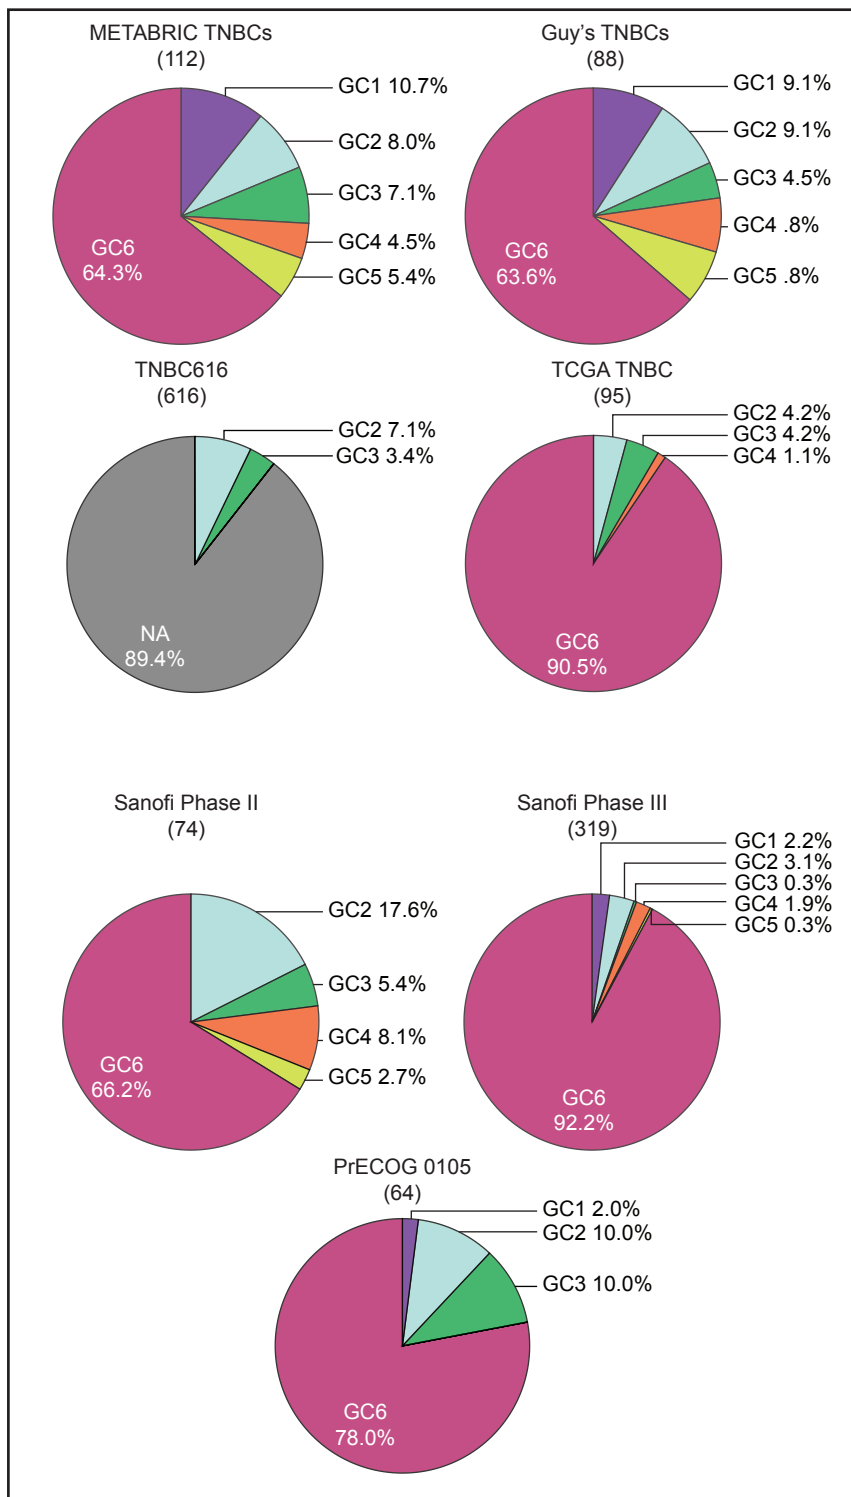

**Supplementary Figure S2.** Classification of TNBC cohorts using the *Guy's-set 33* decision tree. The pie charts illustrate the proportion of the GC subtypes in four primary invasive TNBC cohorts (METABRIC TNBC, Guy's TNBC, TNBC616 and TCGA TNBC), as well as in three clinical TNBC studies (Sanofi Phase II, Sanofi Phase III and PrECOG 0105). The number of tumours is listed in brackets and the percentage for each subtype is shown next to the respective pie.
