# Supplementary material
Source: PubMed Central journal article supplement (PMC6330084)
Supplement: NIHMS80112-supplement-Supplementary_figure_4.pdf [file NIHMS80112-supplement-Supplementary_figure_4.pdf]

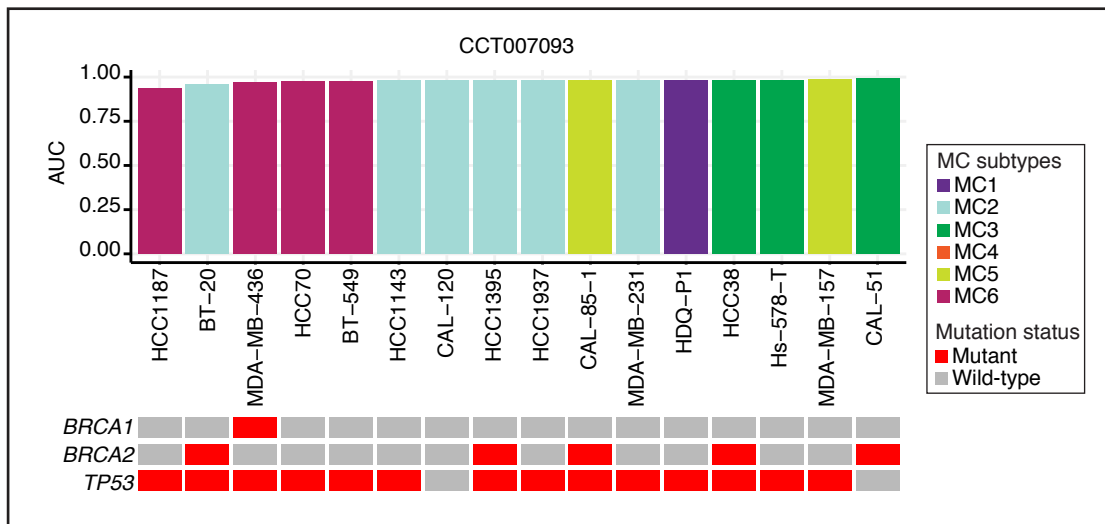

**Supplementary Figure S4.** Barplot representing sensitivity to CCT007093, a small molecule PPM1D inhibitor, in TNBC cell line models (x-axis). The AUC (y-axis) represents the relative drug sensitivity, whereby a lower AUC indicates an increased sensitivity. Cell line models are ranked according to their AUC and bars are coloured by MC classification.
